# Supplementary material for: Communicating Evidence about the Causes of Obesity and Support for Obesity Policies: Two Population-Based Survey Experiments
Source: Int J Environ Res Public Health. 2020 Sep 8;17(18):6539. doi: 10.3390/ijerph17186539 (PMC7559841; doi:10.3390/ijerph17186539)
Supplement: Supplementary file 1 [file ijerph-17-06539-s001.pdf]

***Supplement to: Communicating evidence about the causes of obesity and support for obesity policies in British and US populations: two population-based survey experiments***

**Study 1**

**Messages**

|                                                                                     |                                                                                                                                                                                                                                                                                                                                                                                                                                                                                                                                                                                                                                                                                                                                                                                                                                                                                                                                                                           |
|-------------------------------------------------------------------------------------|---------------------------------------------------------------------------------------------------------------------------------------------------------------------------------------------------------------------------------------------------------------------------------------------------------------------------------------------------------------------------------------------------------------------------------------------------------------------------------------------------------------------------------------------------------------------------------------------------------------------------------------------------------------------------------------------------------------------------------------------------------------------------------------------------------------------------------------------------------------------------------------------------------------------------------------------------------------------------|
| <b>Group 1. Control</b>                                                             | No message.                                                                                                                                                                                                                                                                                                                                                                                                                                                                                                                                                                                                                                                                                                                                                                                                                                                                                                                                                               |
| <b>Group 2. Obesity</b><br>(a): Availability<br>and cost + images                   | <p>Everyone makes choices about what they eat, but the food environment influences what choices are available. Currently, highly processed foods that are high in sugar and fat are easily available and much cheaper than healthier foods such as fruits and vegetables. There are also parts of Great Britain in which there is limited access to grocery stores and fresh foods, and high availability of fast food restaurants and convenience stores that sell less healthy food. Restaurant portion sizes have increased in recent years, leading people to eat more food overall, and research has indicated that food advertisements and marketing increases consumption of unhealthy foods. Therefore, aspects of the food environment play a role in causing obesity.</p> <div> 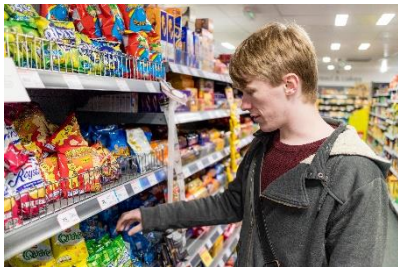 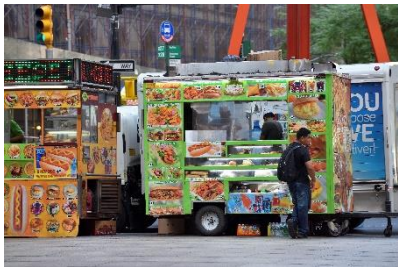 </div> |
| <b>Group 3. Obesity</b><br>(b): Cost,<br>Availability, and<br>marketing +<br>images | <p>You may think (have heard or read) that people have control over the choices that they make. For instance, you may believe that a person controls what they eat. However, the evidence suggests that this is not the complete story.</p> <p>Everyone makes choices about what they eat but our food environments have a strong influence on this.</p> <p>While personal choice does play a role, it only operates inside a much larger system of choices that are presented to us within our environments.</p> <p>For example, if unhealthy food is cheaper, more widely available, and heavily marketed, research shows that people are more likely to</p>                                                                                                                                                                                                                                                                                                            |

choose unhealthy food.

Put simply, our food environments play a large role in causing obesity.

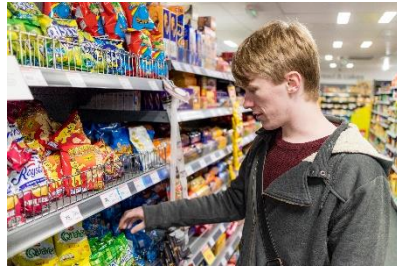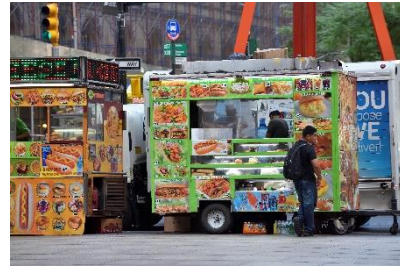

#### Group 4.

Behaviour (a):

Availability and

cost + images

Everyone makes choices about their own behaviour, but the situation and environment influences what choices are available. People only engage in the activities and behaviour that are available. In some parts of Great Britain, the options are different to those available in other parts. If people need to get to work and the only options are driving or catching a bus, then they will choose one of these two options. Consumption of single-use plastic has increased dramatically in recent years with the rise of take-away drinks and food, and pre-packaged fruit and vegetables. Therefore, aspects of the environment play a role in the general behaviour that people engage in.

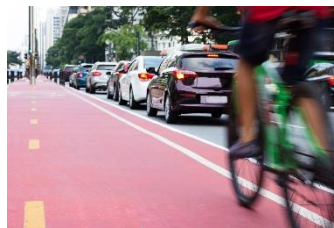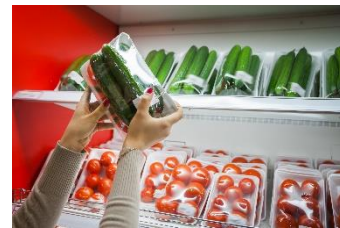

#### Group 5.

Behaviour (b):

Cost, Availability,

and marketing +

images

You may think (have heard or read) that people have control over the choices that they make. For instance, you may believe that a person is in complete control of their choice of transport or how much they recycle. However, the evidence suggests that this is not the complete story.

Everyone makes choices about what they do day-to-day but our environments have a strong influence on this.

While personal choice does play a role, it only operates inside a much larger system of choices that are presented to us within our environments.

If engaging in a given behaviour is cheaper, more widely available, and heavily marketed, research shows that people are more likely to choose this option. For example, if buying coffee in single use plastic cups is cheap and more convenient to use than multiple use plastic cups then people are more likely to use them. If there are no cycle lanes and public transport is too expensive, then people are more likely to choose driving a car despite it being less environmentally friendly.

Put simply, our environment plays a large role in our day-to-day behaviours and choices.

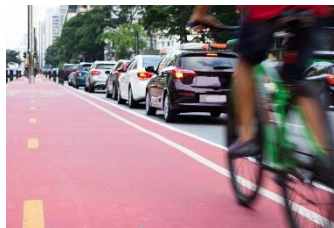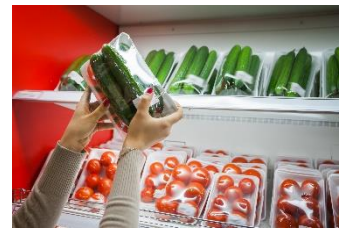

*Note.* The images used in Group 3 and 4 were purchased from Shutterstock and the images used in Groups 5 and 6 were purchased from IStock. All are royalty-free and we therefore have rights to use them in our research and to share in this file.

**Table S1.** Weighted demographic characteristics of the sample by group (%)

|                      | Group 1:<br>Control<br><br>( <i>n</i> = 354) | Group 2:<br>Obesity (a)<br><br>( <i>n</i> = 312) | Group 3:<br>Obesity (b)<br><br>( <i>n</i> = 323) | Group 4:<br>Behaviour (a)<br><br>( <i>n</i> = 334) | Group 5:<br>Behaviour (b)<br><br>( <i>n</i> = 358) |
|----------------------|----------------------------------------------|--------------------------------------------------|--------------------------------------------------|----------------------------------------------------|----------------------------------------------------|
| Gender               |                                              |                                                  |                                                  |                                                    |                                                    |
| Male                 | 51                                           | 50                                               | 53                                               | 42                                                 | 46                                                 |
| Female               | 49                                           | 50                                               | 47                                               | 58                                                 | 54                                                 |
| Age                  |                                              |                                                  |                                                  |                                                    |                                                    |
| 18-24                | 14                                           | 11                                               | 8                                                | 15                                                 | 8                                                  |
| 25-34                | 13                                           | 14                                               | 12                                               | 14                                                 | 10                                                 |
| 35-44                | 14                                           | 16                                               | 22                                               | 18                                                 | 21                                                 |
| 45-54                | 17                                           | 21                                               | 21                                               | 17                                                 | 21                                                 |
| 55+                  | 42                                           | 39                                               | 37                                               | 36                                                 | 39                                                 |
| Socioeconomic status |                                              |                                                  |                                                  |                                                    |                                                    |
| AB                   | 28                                           | 28                                               | 27                                               | 32                                                 | 25                                                 |
| C1C2                 | 46                                           | 54                                               | 49                                               | 47                                                 | 54                                                 |
| DE                   | 25                                           | 18                                               | 24                                               | 21                                                 | 21                                                 |
| Education            |                                              |                                                  |                                                  |                                                    |                                                    |
| Low                  | 25                                           | 34                                               | 32                                               | 28                                                 | 27                                                 |
| Moderate             | 44                                           | 42                                               | 42                                               | 49                                                 | 39                                                 |
| High                 | 31                                           | 24                                               | 26                                               | 23                                                 | 34                                                 |
| Region               |                                              |                                                  |                                                  |                                                    |                                                    |

---

|                             |    |    |    |    |    |
|-----------------------------|----|----|----|----|----|
| North East                  | 5  | 2  | 5  | 6  | 3  |
| North West                  | 9  | 10 | 11 | 11 | 11 |
| Yorkshire and the<br>Humber | 8  | 10 | 10 | 9  | 11 |
| East Midlands               | 7  | 6  | 6  | 9  | 8  |
| West Midlands               | 10 | 10 | 10 | 9  | 8  |
| East of England             | 6  | 10 | 9  | 7  | 10 |
| London                      | 17 | 11 | 14 | 13 | 12 |
| South East                  | 12 | 16 | 12 | 10 | 14 |
| South West                  | 11 | 11 | 11 | 10 | 13 |

---

## Descriptive statistics

**Table S2.** Descriptive statistics (mean (SD) [*n*]) for the primary and secondary outcomes by

|                      | <b>Group 1:</b> | <b>Group 2:</b>    | <b>Group 3:</b>    | <b>Group 4:</b>      | <b>Group 5:</b>      |
|----------------------|-----------------|--------------------|--------------------|----------------------|----------------------|
|                      | <b>Control</b>  | <b>Obesity (a)</b> | <b>Obesity (b)</b> | <b>Behaviour (a)</b> | <b>Behaviour (b)</b> |
| <b>Support</b>       | 4.73 (1.74)     | 4.83 (1.86)        | 4.59 (1.88)        | 4.72 (1.74)          | 4.82 (1.74)          |
|                      | [354]           | [312]              | [323]              | [334]                | [358]                |
| <b>Obesity</b>       | 4.98 (1.26)     | 4.97 (1.39)        | 4.70 (1.36)        | 4.89 (1.3)           | 4.97 (1.23)          |
| <b>Attributions</b>  | [354]           | [312]              | [323]              | [334]                | [358]                |
| <b>Behavioural</b>   | 5.49 (0.86)     | 5.63 (0.91)        | 5.44 (0.93)        | 5.54 (0.85)          | 5.59 (0.87)          |
| <b>Attributions</b>  | [345]           | [304]              | [315]              | [328]                | [358]                |
| <b>Subjective</b>    |                 | 5.98 (0.97)        | 5.94 (1.00)        | 5.76 (1.04)          | 5.98 (0.89)          |
| <b>Comprehension</b> | -               | [303]              | [322]              | [325]                | [347]                |

randomised group

## Sensitivity analyses (Study 1)

### *Covariates*

The first set of sensitivity analyses were those in which there were no covariates in the models. Across most analyses, the main pattern of the results remained the same. There was no evidence that the Obesity message (a),  $B = -0.01$ , 95% CI  $[-0.21, 0.19]$ ,  $p = .891$ , Behaviour message (a),  $B = -0.10$ , 95% CI  $[-0.29, 0.10]$ ,  $p = .343$ , and Behaviour message (b),  $B = -0.01$ , 95% CI  $[-0.21, 0.18]$ ,  $p = .895$ , had an effect on beliefs about the environment's influence on obesity. The Obesity message (b)  $B = -0.28$ , 95% CI  $[-0.48, 0.09]$ ,  $p = .005$ , did significant weaken this belief, as it did in the primary analysis.

However, for one comparison there was a notable difference. In the main results, the Obesity message (a) strengthened beliefs about the environment's influence on human behaviour; however, in the model that did not include covariates, this effect was not statistically significant at the Bonferroni adjusted  $\alpha = .0125$  level,  $B = 0.15$ , 95% CI  $[0.01, 0.28]$ ,  $p = .037$ . The other three groups did not have significant effects on this belief in the primary analysis, nor in the sensitivity analyses. Obesity message (b):  $B = -0.05$ , 95% CI  $[-0.19, 0.08]$ ,  $p = .440$ ; Behaviour message (a):  $B = 0.05$ , 95% CI  $[-0.08, 0.18]$ ,  $p = .463$ ; Behaviour message (b):  $B = 0.10$ , 95% CI  $[-0.01, 0.23]$ ,  $p = .143$ .

There were no substantive differences between the primary analyses and sensitivity analyses for the policy support outcome. None of the interventions affected policy support after removing covariates from the model: Obesity message (a),  $B = 0.10$ , 95% CI  $[-0.18, 0.37]$ ,  $p = .483$ ; Obesity message (b),  $B = -0.15$ , 95% CI  $[-0.42, 0.12]$ ,  $p = .288$ ; Behaviour message (a),  $B = -0.02$ , 95% CI  $[-0.29, 0.25]$ ,  $p = .900$ ; Behaviour message (b),  $B = 0.08$ , 95% CI  $[-0.18, 0.35]$ ,  $p = .542$ .

### *Outliers*

The second set of sensitivity analyses were those in which outliers were not excluded. As in the primary results, there was no evidence that the Behaviour message (a),  $B = -0.06$ , 95% CI  $[-0.09, 0.21]$ ,  $p = .448$ , or the Behaviour message (b),  $B = 0.17$ , 95% CI  $[0.23, 0.31]$ ,  $p = .023$ , or the Obesity message (b),  $B = -0.44$ , 95% CI  $[-0.19, 0.11]$ ,  $p = .563$ , changed beliefs about environment's influence on behaviour at the  $\alpha = .0125$  level. The one difference was the Obesity message (a),  $B = 0.16$ , 95% CI  $[0.07, 0.31]$ ,  $p = .040$ , which was statistically significant at the  $\alpha = .0125$  level in the primary analysis but is not significant in this sensitivity analysis.

No outliers were removed from the following two variables: policy support or beliefs about environments role in obesity. Therefore, no sensitivity analyses were conducted.

## Study 2

**Table S3.** Weighted demographic characteristics of the sample by group (%) for the USA

|             | Group 1: Control<br>( <i>n</i> = 473) | Group 2: Obesity (a)<br>( <i>n</i> = 441) | Group 3: Obesity (c)<br>( <i>n</i> = 401) |
|-------------|---------------------------------------|-------------------------------------------|-------------------------------------------|
| Gender      |                                       |                                           |                                           |
| Male        | 49                                    | 45                                        | 52                                        |
| Female      | 51                                    | 55                                        | 48                                        |
| Age         |                                       |                                           |                                           |
| 18-24       | 13                                    | 14                                        | 11                                        |
| 25-34       | 20                                    | 17                                        | 15                                        |
| 35-44       | 13                                    | 12                                        | 20                                        |
| 45-54       | 15                                    | 14                                        | 14                                        |
| 55+         | 38                                    | 43                                        | 39                                        |
| Education   |                                       |                                           |                                           |
| Low         | 39                                    | 41                                        | 39                                        |
| Medium-low  | 35                                    | 32                                        | 30                                        |
| Medium-high | 15                                    | 17                                        | 22                                        |
| High        | 11                                    | 10                                        | 9                                         |
| Region      |                                       |                                           |                                           |
| Northeast   | 18                                    | 22                                        | 19                                        |
| Midwest     | 26                                    | 20                                        | 19                                        |
| South       | 39                                    | 36                                        | 41                                        |
| West        | 18                                    | 22                                        | 21                                        |

sample

**Table S4.** Weighted demographic characteristics of the sample by group (%) for the English sample

|                      | Group 1: Control<br>( <i>n</i> = 483) | Group 2: Obesity (a)<br>( <i>n</i> = 450) | Group 3: Obesity (c)<br>( <i>n</i> = 464) |
|----------------------|---------------------------------------|-------------------------------------------|-------------------------------------------|
| Gender               |                                       |                                           |                                           |
| Male                 | 47                                    | 47                                        | 51                                        |
| Female               | 53                                    | 53                                        | 49                                        |
| Age                  |                                       |                                           |                                           |
| 18-24                | 13                                    | 11                                        | 9                                         |
| 25-34                | 11                                    | 15                                        | 16                                        |
| 35-44                | 16                                    | 17                                        | 16                                        |
| 45-54                | 20                                    | 18                                        | 21                                        |
| 55+                  | 40                                    | 38                                        | 37                                        |
| Socioeconomic status |                                       |                                           |                                           |
| AB                   | 28                                    | 32                                        | 25                                        |
| C1C2                 | 53                                    | 47                                        | 53                                        |
| DE                   | 19                                    | 21                                        | 22                                        |
| Education            |                                       |                                           |                                           |
| Low                  | 29                                    | 27                                        | 34                                        |
| Moderate             | 46                                    | 48                                        | 35                                        |
| High                 | 25                                    | 25                                        | 31                                        |
| Region               |                                       |                                           |                                           |
| North East           | 5                                     | 6                                         | 6                                         |

---

|                             |    |    |    |
|-----------------------------|----|----|----|
| North West                  | 11 | 10 | 12 |
| Yorkshire and the<br>Humber | 14 | 10 | 9  |
| East Midlands               | 8  | 10 | 11 |
| West Midlands               | 11 | 10 | 7  |
| East of England             | 9  | 10 | 13 |
| London                      | 12 | 16 | 15 |
| South East                  | 17 | 16 | 17 |
| South West                  | 12 | 11 | 10 |

---

## Study 2 interventions

Group 2: Obesity (a) [31]: “Everyone makes choices about what they eat, but the food environment influences what choices are available. Currently, highly processed foods that are high in sugar and fat are easily available and much cheaper than healthier foods such as fruits and vegetables. There are also parts of [America/England] in which there is limited access to grocery stores and fresh foods, and high availability of fast food restaurants and convenience stores that sell less healthy food. Restaurant portion sizes have increased in recent years, leading people to eat more food overall, and research has indicated that food advertisements and marketing increases consumption of unhealthy foods. Therefore, aspects of the food environment play a role in causing obesity.”

Group 3: Obesity (c) [32]: “Lately there has been a lot of talk about the factors that influence food choices in [America/England]. For example, food advertising can lead to the selection of unhealthy food and beverages. Certain food additives, such as extra salt, sugar, and caffeine, can also increase the desire for unhealthy food. And the placement of snack food and sugary beverages at checkout counters, especially in non-grocery retail stores, can often result in unintended food purchases and overeating. Consumers should be able to make their own dietary choices. But they also need to be free from the influence of heavy advertising, exposures to habit forming food ingredients, and invasive food product placement.”

**Descriptive statistics**

**Table S5.** Descriptive statistics (mean [SD]) for the primary and secondary outcomes by country and randomised group

|                                               | Group 1: Control  |                   | Group 2: Obesity (a) |                   | Group 3: Obesity (c) |                   |
|-----------------------------------------------|-------------------|-------------------|----------------------|-------------------|----------------------|-------------------|
|                                               | England           | USA               | England              | USA               | England              | USA               |
|                                               | ( <i>n</i> = 483) | ( <i>n</i> = 473) | ( <i>n</i> = 450)    | ( <i>n</i> = 441) | ( <i>n</i> = 464)    | ( <i>n</i> = 400) |
| <b>Support (Discouraging policies)</b>        | 0.24 (0.89)       | -0.27 (0.95)      | 0.21 (0.95)          | -0.23 (0.97)      | 0.20 (0.93)          | -0.22 (0.99)      |
| <b>Support (Encouraging policies)*</b>        | 0.08 (0.84)       | -0.13 (0.91)      | 0.13 (0.81)          | -0.05 (1.07)      | 0.06 (0.91)          | 0.04 (0.91)       |
|                                               | [481]             | [461]             | [444]                | [430]             | [458]                | [393]             |
| <b>Support for tax on confectionery</b>       | 3.38 (1.89)       | 2.65 (1.74)       | 3.52 (1.95)          | 2.82 (1.84)       | 3.34 (1.93)          | 2.70 (1.74)       |
| <b>Support for limits on snack size</b>       | 4.18 (1.75)       | 3.73 (1.83)       | 3.97 (1.83)          | 3.91 (1.84)       | 3.98 (1.81)          | 3.77 (1.88)       |
| <b>Support for restrictions on food ads</b>   | 5.39 (1.60)       | 4.25 (1.95)       | 5.40 (1.63)          | 4.23 (1.97)       | 5.39 (1.58)          | 4.60 (1.92)       |
| <b>Support for more healthy food</b>          |                   |                   |                      |                   |                      |                   |
| <b>availability</b>                           | 5.84 (1.19)       | 5.51 (1.50)       | 5.87 (1.25)          | 5.51 (1.69)       | 5.75 (1.34)          | 5.56 (1.53)       |
| <b>Support for limits on SSB size</b>         | 4.61 (1.73)       | 3.68 (1.93)       | 4.47 (1.85)          | 3.53 (1.93)       | 4.56 (1.83)          | 3.68 (2.04)       |
| <b>Support for calorie labelling on menus</b> | 5.28 (1.50)       | 5.11 (1.66)       | 5.30 (1.46)          | 5.37 (1.69)       | 5.18 (1.57)          | 5.47 (1.43)       |

|                                                            |             |             |             |             |             |             |
|------------------------------------------------------------|-------------|-------------|-------------|-------------|-------------|-------------|
| <b>Support for banning unhealthy snacks<br/>in schools</b> | 4.63 (1.80) | 3.85 (1.91) | 4.65 (1.82) | 3.96 (1.99) | 4.66 (1.85) | 3.99 (1.97) |
| <b>Causal belief: Food Environment</b>                     | 4.79 (1.39) | 4.61 (1.54) | 4.67 (1.44) | 4.50 (1.56) | 4.59 (1.50) | 4.60 (1.53) |
| <b>Causal belief: Genetics</b>                             | 3.38 (1.24) | 3.98 (1.34) | 3.38 (1.34) | 3.88 (1.35) | 3.29 (1.27) | 4.02 (1.31) |
| <b>Causal belief: Willpower</b>                            | 4.73 (1.36) | 4.51 (1.61) | 4.84 (1.41) | 4.57 (1.47) | 4.81 (1.4)  | 4.60 (1.47) |

*Note.* \*Sample sizes are different for this variable and are added in [n]

## **Sensitivity analyses**

### *Covariates*

We performed sensitivity analyses to test the robustness of the main results under different analytical decisions. The first set of sensitivity analyses were those in which there were no covariates in the models. Across all analyses there were no substantive differences between the main results and these sensitivity analyses. Namely, there was no effect of the Obesity message (a),  $B = 0.00$ , 95% CI  $[-0.08, 0.09]$ ,  $p = .940$ , or Obesity message (c),  $B = 0.00$ , 95% CI  $[-0.08, 0.09]$ ,  $p = .955$ , on support for discouraging policies. There was no effect of the Obesity message (a),  $B = 0.07$ , 95% CI  $[-0.02, 0.15]$ ,  $p = .128$ , or Obesity message (c),  $B = 0.07$ , 95% CI  $[-0.02, 0.15]$ ,  $p = .127$ , on support for encouraging policies effect.

There was no effect of the Obesity message (a),  $B = -0.05$ , 95% CI  $[-0.17, 0.07]$ ,  $p = .395$ , or Obesity message (c),  $B = -0.03$ , 95% CI  $[-0.15, 0.09]$ ,  $p = .638$ , on the belief that genes cause obesity. There was also effect of the Obesity message (a),  $B = 0.09$ , 95% CI  $[-0.04, 0.22]$ ,  $p = .191$ , or Obesity message (c),  $B = 0.09$ , 95% CI  $[-0.05, 0.22]$ ,  $p = .199$ , on the belief that a lack of willpower causes obesity. And finally, there was also no effect of the Obesity message (a),  $B = -0.12$ , 95% CI  $[-0.25, 0.02]$ ,  $p = .096$ , or Obesity message (c),  $B = -0.11$ , 95% CI  $[-0.25, 0.03]$ ,  $p = .114$ , on the belief that a lack of willpower causes obesity.

### *Outliers*

The second set of sensitivity analyses were those in which outliers were not excluded. The results of the sensitivity analyses were in accord with the primary analyses. Namely, there was no effect of Obesity message (a),  $B = 0.03$ , 95% CI  $[-0.06, 0.12]$ ,  $p = .495$ , or Obesity message (c),  $B = 0.05$ , 95% CI  $[-0.04, 0.14]$ ,  $p = .280$ , on support for Encouraging policies.

### *Supplemental materials*

There were no outliers in the following variables: support for Discouraging policies, the belief that the environment influences obesity, the belief that genetics influence obesity, or the belief that a lack of willpower influences obesity. Sensitivity analyses were therefore not conducted for these variables.

. **Table S6.** PCA factor loadings for policy support items

|                                    | <b>Support for<br/>Discouraging policies<br/>(Variance explained =<br/>52%)</b> | <b>Support for Encouraging<br/>policies<br/>(Variance explained =<br/>14%)</b> |
|------------------------------------|---------------------------------------------------------------------------------|--------------------------------------------------------------------------------|
| Confectionary tax                  | <b>.32</b>                                                                      | -.14                                                                           |
| Portion size: snacks               | <b>.30</b>                                                                      | -.06                                                                           |
| Portion size: SSBs                 | <b>.29</b>                                                                      | -.01                                                                           |
| Advertising ban                    | .15                                                                             | <b>.23</b>                                                                     |
| Increase worksite<br>healthy foods | -.02                                                                            | <b>.50</b>                                                                     |
| Menu calorie labels                | -.06                                                                            | <b>.53</b>                                                                     |
| Unhealthy snack ban<br>in schools  | <b>.22</b>                                                                      | .11                                                                            |

*Note.* Factor loadings over .20 are in bold.

**Table S7.** Interactions between group, BMI, and country on causal beliefs

|                       | Discouraging policies<br>( <i>n</i> = 2586) |          | Encouraging policies<br>( <i>n</i> = 2544) |          |
|-----------------------|---------------------------------------------|----------|--------------------------------------------|----------|
|                       | B [95% CI]                                  | <i>p</i> | B [95% CI]                                 | <i>p</i> |
| Country x Ortiz       | -0.21 [-1.08, 0.67]                         | .645     | 0.19 [-0.65, 1.03]                         | .654     |
| Country x P&L         | -0.36 [-1.23, 0.50]                         | .411     | -0.28 [-1.12, 0.55]                        | .510     |
| BMI x country         | -0.01 [-0.03, 0.02]                         | .555     | 0.02 [0.00, 0.04]                          | .103     |
| BMI x Ortiz           | -0.02 [-0.08, 0.03]                         | .396     | 0.00 [-0.05, 0.05]                         | .956     |
| BMI x P&L             | -0.04 [-0.09, 0.02]                         | .168     | -0.01 [-0.06, 0.04]                        | .635     |
| BMI x country x P&L   | 0.02 [-0.02, 0.05]                          | .331     | 0.01 [-0.02, 0.04]                         | .497     |
| BMI x country x Ortiz | 0.01 [-0.02, 0.04]                          | .509     | 0.00 [-0.03, 0.03]                         | .938     |

*Note.* These models control for gender, age, country, BMI, and group.

**Table S8.** Interactions between group, BMI, and country on causal beliefs

|                       | <b>Causal beliefs: environment</b> |          | <b>Causal beliefs: genetics</b> |          | <b>Causal beliefs: willpower</b> |          |
|-----------------------|------------------------------------|----------|---------------------------------|----------|----------------------------------|----------|
|                       | <b>(<i>n</i> = 2711)</b>           |          | <b>(<i>n</i> = 2586)</b>        |          | <b>(<i>n</i> = 2711)</b>         |          |
|                       | B [95% CI]                         | <i>p</i> | B [95% CI]                      | <i>p</i> | B [95% CI]                       | <i>p</i> |
| Country x Ortiz       | 0.47 [-0.90, 1.83]                 | .504     | 0.29 [-0.91, 1.49]              | .637     | -0.78 [-2.11, 0.55]              | .249     |
| Country x P&L         | 0.60 [-0.75, 1.95]                 | .385     | 0.60 [-0.59, 1.78]              | .325     | -0.48 [-1.79, 0.83]              | .471     |
| BMI x country         | 0.03 [-0.01, 0.06]                 | .139     | 0.00 [-0.03, 0.03]              | .909     | -0.03 [-0.06, 0.01]              | .112     |
| BMI x Ortiz           | 0.03 [-0.05, 0.11]                 | .476     | 0.00 [-0.07, 0.07]              | .982     | -0.04 [-0.12, 0.04]              | .293     |
| BMI x P&L             | 0.03 [-0.05, 0.12]                 | .424     | 0.02 [-0.06, 0.09]              | .640     | -0.02 [-0.10, 0.06]              | .579     |
| BMI x country x P&L   | -0.02 [-0.07, 0.03]                | .382     | -0.02 [-0.07, 0.02]             | .307     | 0.01 [-0.03, 0.06]               | .570     |
| BMI x country x Ortiz | -0.01 [-0.06, 0.04]                | .694     | 0.00 [-0.05, 0.04]              | .825     | 0.03 [-0.02, 0.08]               | .244     |

*Note.* These models control for gender, age, country, BMI, and group.

**Table S9.** Correlations (*Pearson's r* [95% CIs]) between policy support and causal beliefs  
(Study 1)

|                                        | 1.                | 2.                | 3. |
|----------------------------------------|-------------------|-------------------|----|
| <b>1. Support for obesity policies</b> | -                 |                   |    |
| <b>2. Causal beliefs: Obesity</b>      | .36<br>[.31, .40] | -                 |    |
| <b>3. Causal beliefs: behaviour</b>    | .24<br>[.19, .28] | .45<br>[.41, .50] | -  |

**Table S10.** Correlations (*Pearson's r* [95% CIs]) between policy support and causal beliefs in England and the USA (Study 2)

|                                             | <b>1.</b>            | <b>2.</b>          | <b>3.</b>          | <b>4.</b>            | <b>5.</b>            |
|---------------------------------------------|----------------------|--------------------|--------------------|----------------------|----------------------|
| <b>1. Support for encouraging policies</b>  | -                    | .37<br>[.32, .43]  | .45<br>[.39, .50]  | -.04<br>[-.09, .02]  | .09<br>[.03, .14]    |
| <b>2. Support for discouraging policies</b> | .40<br>[.34, .45]    | -                  | .49<br>[.44, .53]  | .05<br>[.00, .11]    | -.01<br>[-.07, .04]  |
| <b>3. Causal belief: Food environment</b>   | .34<br>[.29, .39]    | .49<br>[.45, .54]  | -                  | .03<br>[-.03, .08]   | .11<br>[.06, .16]    |
| <b>4. Causal belief: Genetics</b>           | -.07<br>[-.12, -.01] | .03<br>[-.03, .08] | .04<br>[-.02, .09] | -                    | -.08<br>[-.14, -.02] |
| <b>5. Causal belief: Willpower</b>          | .14<br>[.09, .20]    | .02<br>[-.03, .07] | .01<br>[-.04, .06] | -.16<br>[-.21, -.11] | -                    |

*Note.* Correlations for participants residing in the USA are reported in the top right whereas correlations for participants residing in England are reported in the bottom left.
